# Supplementary material for: Photo-initiated enhanced antibacterial therapy using a non-covalent functionalized graphene oxide nanoplatform
Source: Royal Society of Chemistry journal article supplement (doi:10.1039/d1dt00642h), 2021-01-01
Supplement: d1dt00642h1.pdf [file d1dt00642h1.pdf]

## Supplementary data

### **Photo-initiated enhanced antibacterial therapy using a non-covalent functionalized graphene oxide nanoplatform**

Lin Mei<sup>a\*</sup>, Yanmei Shi<sup>b</sup>, Zhiqiang Miao<sup>a</sup>, Fengyi Cao<sup>a</sup>, Kai Hu<sup>b</sup>, Chunlei Lin<sup>a</sup>, Xiumin Li<sup>c</sup>, Jing Li<sup>d</sup>, and Jiagui Gao<sup>a</sup>

<sup>a</sup> School of Materials and Chemical Engineering, Zhongyuan University of Technology, Zhengzhou 450007, P.R. China

<sup>b</sup> Academy of Chinese Medical Sciences, Henan University of Chinese Medicine, Zhengzhou 450001, P.R. China

<sup>c</sup> Department of Microbiology and Immunology, New York Medical College, New York, NY 10595, USA

<sup>d</sup> School of Foreign Languages, Zhongyuan University of Technology, Zhengzhou 450007, P.R. China

\* Corresponding Author

Tel.: +86 371 62506163. E-mail: lins79@sina.com (Lin Mei)

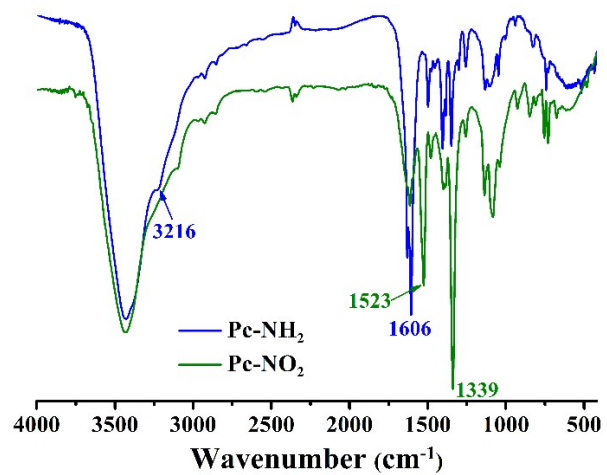

Figure S1. IR spectra of  $\text{Pc-NO}_2$  and  $\text{Pc-NH}_2$ .

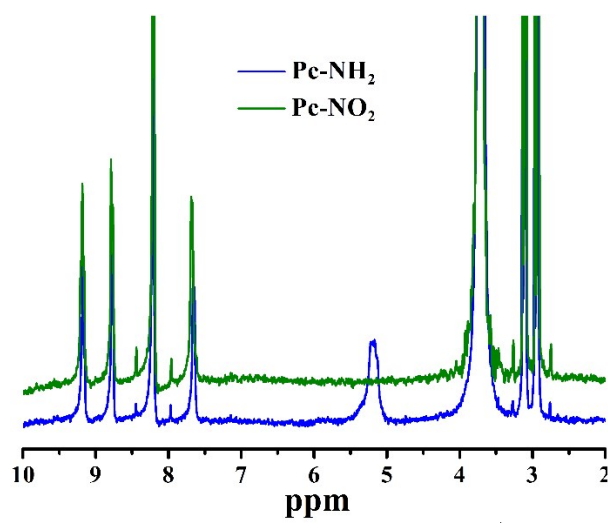

Figure S2.  $^1\text{H}$  NMR (deuterated DMF solvent) spectra of  $\text{Pc-NO}_2$  and  $\text{Pc-NH}_2$ .

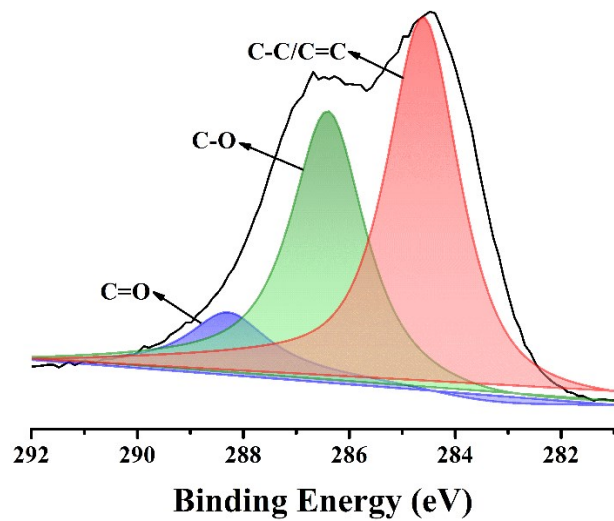

Figure S3. Curve fitting of the C1s spectrum of Pc-NH<sub>2</sub>@GO.

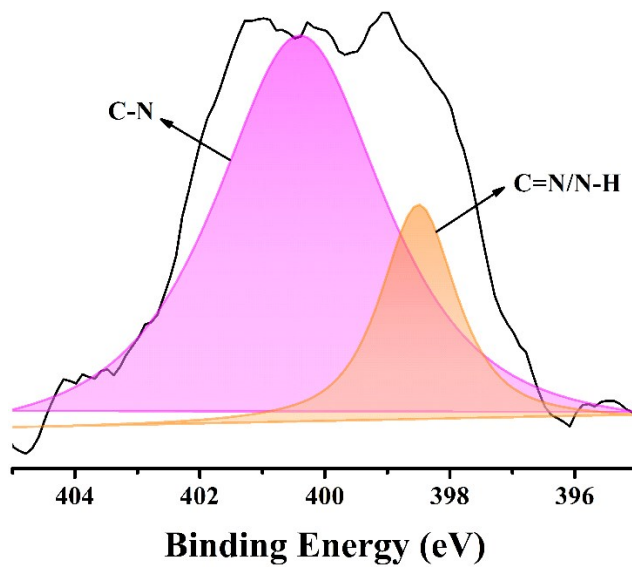

Figure S4. Curve fitting of the N1s spectrum of Pc-NH<sub>2</sub>@GO.

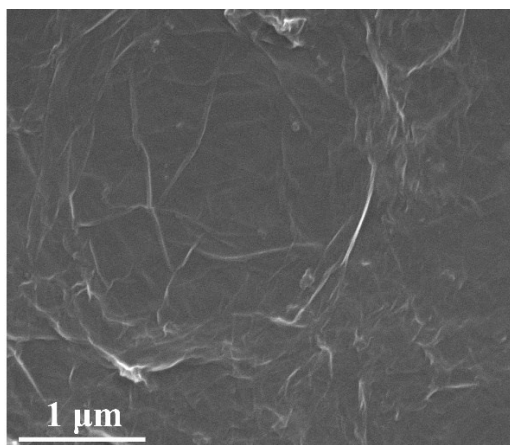

Figure S5. SEM image of GO.

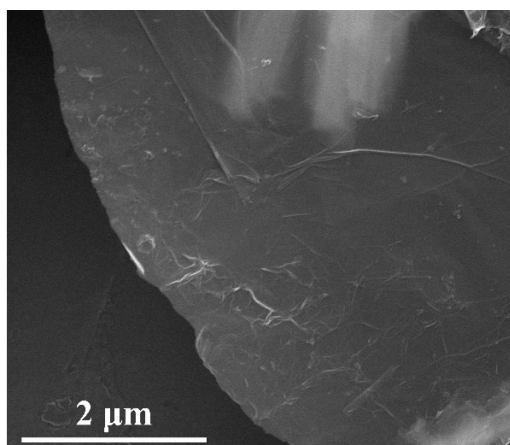

Figure S6. SEM image of Pc-NH<sub>2</sub>@GO.

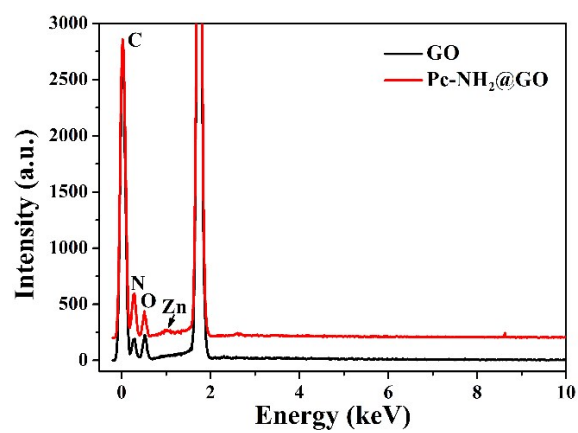

Figure S7. EDS analysis of GO and Pc-NH<sub>2</sub>@GO.

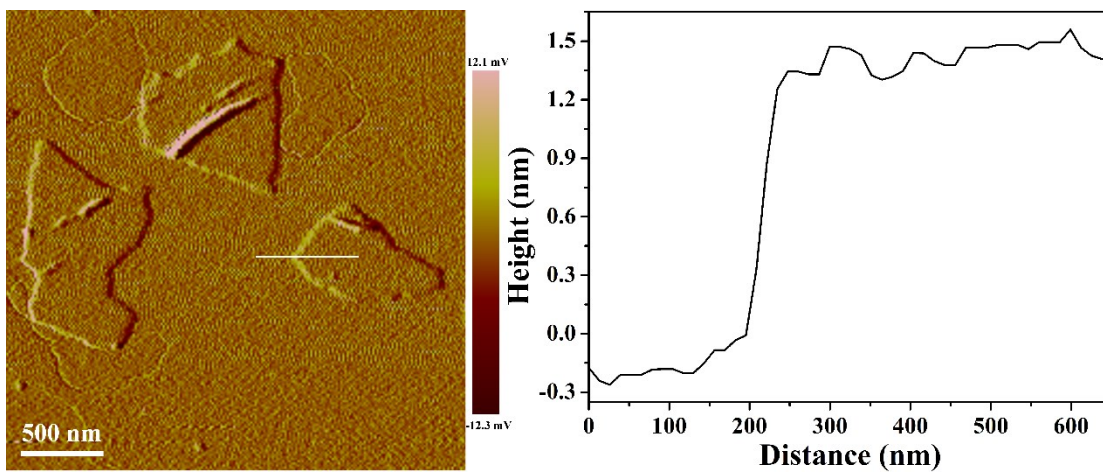

Figure S8. Representative AFM image of GO and its corresponding height profiles.

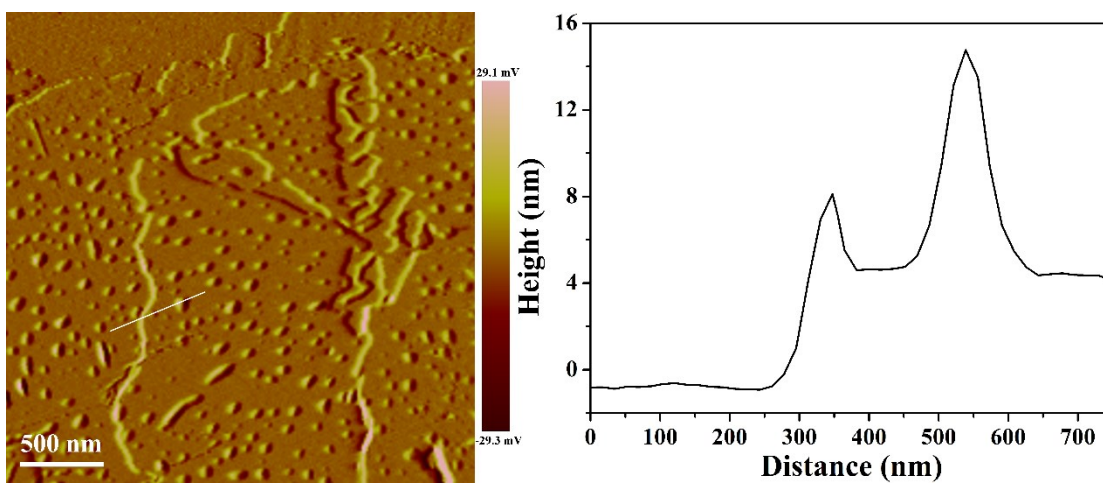

Figure S9. Representative AFM image of Pc-NH<sub>2</sub>@GO and its corresponding height profiles.

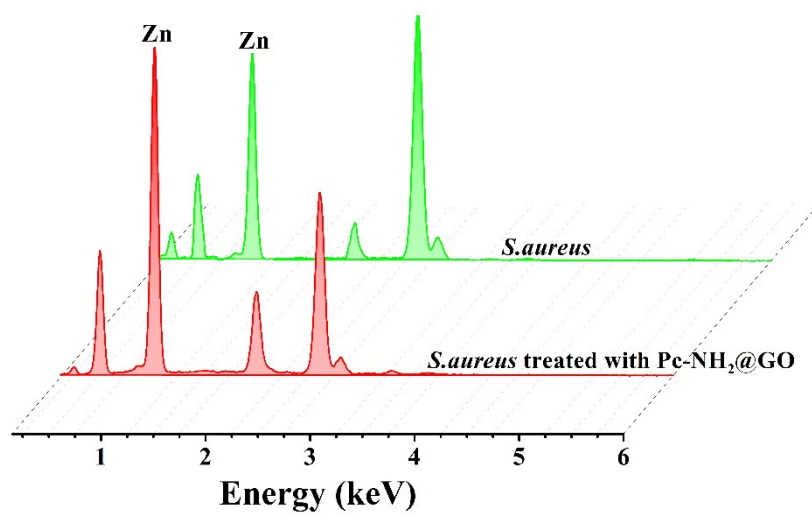

Figure S10. EDS analysis of *S. aureus* before and after treatment with Pc-NH<sub>2</sub>@GO.
